# Supplementary material
Source: Research Square preprint supplement (doi:10.21203/rs.3.rs-9921990/v1)
Supplement: Supplementary file 1 [file dd471dda0642c98d3e06e591.docx]

**Supplementary files 1: Data Collection Tools**

**Consent form for participants**

Dear Madam,

Good morning/afternoon. My name is--------------------------. I am working as a data collector for the study being conducted by Zenaw Tafere (PhD fellow) who is studying for his dissertation with Addis Ababa University. I kindly request you to participate in this study by responding some questions about the food and nutrition situation of your household.

**The study title:**

EFFECT OF NUTRITION SENSITIVE AGRICULTURE INTERVENTIONS ON FOOD AND NUTRITION SECURITY IN NORTHWEST ETHIOPIA

**Purpose of the study:**

This study aimed to assess the impact of nutrition sensitive agriculture interventions on food and nutrition security. The result of the study will be used as evidence to make informed decision making to improve the food and nutrition situation in the study area. Moreover, the aim of this study is to accomplish a dissertation as a partial fulfillment for the PhD degree in Food Security and Development for the principal investigator.

**Procedure and duration:**

I will have a brief interview with you for about 30-45mins. So, I kindly request you to give me your consent to collect the data.

**Risks and benefits:**

The risk of participating in this study is very minimal. There would not be direct payment for participating in this study. But the findings from this research may reveal important information for programing and government planner.

**Confidentiality:**

The information that we collect will be kept confidential. There will be no information that will identify participants. The findings of the study will be general for the study community and will not reflect any thing particularly of individual persons. The answers will be coded to exclude showing names. No reference will be made in oral or written reports that could link participants to the research.

**Rights:**

Participation for this study is fully voluntary. You have the right to declare to participate or decline not to participate in this study, if there is any risky.

Contact address:

If there are any questions or enquires any time about the study or procedures, please contact in this address.

Principal investigator: Zenaw Tafere, email [zenawnews@gmail.com](mailto:zenawnews@gmail.com) or Mobile: 091151 62 62

Addis Ababa University, Institutional Research Ethics review Committee:

Office phone +2511……….…..or P.O.Box_______, Addis Ababa, Ethiopia

I have read/was read to me the consent form. I have clearly understood the purpose of the research, the procedures, the risks and benefits, issues of confidentiality, the right of participation and the contact address for any queries. I have been given the opportunity to ask any questions for things that may have been unclear. I was informed that I have the right to skip parts or stop the study at any time if that I do not want answer. Therefore, I declare my voluntary consent to participate in the study and I will stop the research if it puts unnecessary risk on participants with my signature as indicated below.

Signature of the staff: -----------------

Oral permission given: 1. Yes 2.No→Terminate Interview

**Respondent information sheet**

| Does this household have a child under 2? | | | | | Yes……………….…….…..1  No……………………….....2 | | | | | Stop | |
| --- | --- | --- | --- | --- | --- | --- | --- | --- | --- | --- | --- |
| Code of the respondent: | | | | |  | | | | | | |
| Name/Code of the Kebele: | | | | |  | | | | | | |
| Cluster Number: | | | | |  | | | | | | |
| Name of the interviewer: | | | | | ______________________Date:_________ | | | | | | |
| Name of the Supervisor: | | | | | ______________________Date:__________ | | | | | | |
| PART A: MOTHER’S BACKGROUND CHARACTERISTICS | | | | | | | | | | | |
| No. | | Questions and Filters | | | Coding Categories | | | | | Skip | |
| A1 | | Who is the head of the household? | | | Male headed….……………1  Female headed……….….....2  Elder sister/brother ………...3 | | | | |  | |
| A2 | | Status of the household | | | PSNP NSA supported HHs……1  Only NSA supported HHs…….2  Non-beneficiary ………………3 | | | | |  | |
| A3 | | How many children do you have in total?  [Any small child living under the care of the mother even though not a biological child] | | | Total number of children | | | | |  | |
| A4 | | How many children under two years live in the family? | | | Total number of children  under two years | | | | |  | |
| A5 | | Are you currently pregnant? | | | Yes…………….…….…….…1  No…………...……….……....2  Unsure…………………..…...3 | | | | |  | |
| A6 | | What is your relationship with the child you take care of? | | | Mother …….……….….....…..1  Father …………………...…...2  Grandmother…………......…..3⁭  Other ……………….…..……4⁭ | | | | |  | |
| A7 | | Are you able to read or write a simple sentence? | | | Yes………….………...….…..1  No………….……….….….....2 | | | | | A9 | |
| A8 | | What is the highest level of education that you completed? | | | Informal Education …………1  Primary school (1– 6)……….2  Junior Secondary(7-8)................3  Secondary School(9–10)……….4  Preparatory school (11-12)……..5  Diploma and above……………..6 | | | | |  | |
| A9 | | Can the father read or write a simple sentence? | | | Yes………….………..…..……..1  No………….……….……..…....2 | | | | | A11 | |
| A10 | | Father’s highest level of education? | | | Informal Education ……………1  Primary school (1– 6)……….….2  Junior Secondary(7-8)..................3  Secondary School(9–10)………..4  Preparatory school (11-12)……..5  Diploma and above……………..6 | | | | |  | |
| A11 | | What is your religion? | | | Orthodox………..……………….1  Muslim………..........................….2  Catholic ………………................3  Protestant…………….….…........4  thers (Specify)…………..............5 | | | | |  | |
| A12 | | What is your occupation?  Circle as many as apply. | | | Farmer ……......…..………….…1  Housewife…..……………..……2  Petty trading…..……...…...……3  Daily laborer……………............4  Government employee…………5  Other/Specify ……………….....6 | | | | |  | |
| A13 | | Does the household own any of the following? | Property ownership | | | Yes | | No | |  | |
| Electricity | | | 1 | | 2 | |  | |
| Radio | | | 1 | | 2 | |  | |
| Bicycle | | | 1 | | 2 | |  | |
| Sewing machine | | | 1 | | 2 | |  | |
| Cart | | | 1 | | 2 | |  | |
| Motor Bike | | | 1 | | 2 | |  | |
| Own Corrugated roof house | | | 1 | | 2 | |  | |
| Mobile phone | | | 1 | | 2 | |  | |
| Car | | | 1 | | 2 | |  | |
| **PART B: ANTHROPOMETRIC MEASUREMENTS** | | | | | | | | | | | |
| No. | Questions and Filters | | | | | | Coding Categories | | Skip | | |
| B1 | What is the NAME of the youngest child under two years? | | | | | | ---------------------------------- | |  | | |
| B2 | Sex of (NAME) | | | | | | Male………..……...…..1  Female…………......…..2 | |  | | |
| B3 | Age of (NAME) in months | | | | | | ___/___ /____DD/MM/YY | |  | | |
| B4 | Weight of the child (in Kg) to the nearest 100 gms? or 0.1kg. | | | | | | __________ Kg | |  | | |
| B5 | Height of the child (in cm) to the nearest 1mm or 0.1 cm. | | | | | | Height =__________ cm | |  | | |
| B6 | MUAC of the child (in cm) to the nearest 1mm or 0.1 cm. | | | | | | MUAC=__________ cm | |  | | |
| B7 | Age of the Mother? | | | | | | ________years | |  | | |
| B8 | Weight of the mother (in Kg) to the nearest 100 gms or 0.1kg.? | | | | | | __________ Kg | |  | | |
| B9 | Height of the mother (in cm) to the nearest 1mm or 0.1 cm.? | | | | | | Height =__________ cm | |  | | |
| B10 | MUAC of the mother (in cm) to the nearest 1mm or 0.1 cm. | | | | | | MUAC=__________ cm | |  | | |
| **PART C: MATERNAL NUTRITION** | | | | | | | | | | | |
| C1 | Did you see any health care provider for Antenatal care while you were pregnant with (NAME)? | | | Yes………….….…………..1  No………….…….………....2 | | | | | | | C4 |
| C2 | How many times did you see health care provider for care during the pregnancy? | | | Number of Times____________ | | | | | | |  |
| C3 | Were you counseled on MIYCN during the ANC visit? | | | Yes………….……....…………..1  No………….……..….………....2 | | | | | | |  |
| C4 | Have you heard about the first 1000 days of life? | | | Yes ................................................1  No ................................................2 | | | | | | |  |
| C5 | If yes, what is it? | | | From Conception to two years …..1  Other …..…………………….…...2 | | | | | | |  |
| C6 | What nutritional care do mothers need during pregnancy? Multiple responses are possible (Check as many as apply) | | | Eat less than usual.……..……....………….1  Eat same as usual…………..………….…..2  Eat more energy and protein rich food than usual.....………………………..…….……..3  Eat varied foods …..…………..…......….…4  Eat more iron and Vitamin A rich foods/Take micronutrient supplements like iron & folic acid and Vitamin A………………………..…..5  Use iodized salt when preparing meals…..6  Other…………...….……….…….….…..7  Don’t Know…….…………………..…...99 | | | | | | |  |
| C5 | What nutritional care do mothers need during lactation?  *Multiple responses are possible (Check as many as apply)* | | | Eat less than usual.…............…1  Eat same as usual……...……...2  Eat more than usual..................3  Eat varied foods ………………4  Take micronutrient supplements like iron & folic acid and Vitamin A…………….5  Other……..…….……….….…..6  Don’t Know……………....…...99 | | | | | | |  |
| C6 | When you were pregnant with (NAME), did you eat less than usual, the same as usual, or more than usual? | | | Less………..…..….1  Same…………...….2  More.....…………...3  Don’t remember …...99 | | | | | | |  |
| C7 | When you were pregnant with (NAME), did you take any iron tablets or folic acid? [SHOW TABLET.] | | | Yes……………………..1  No………….....…….....2  Don’t remember …….….99 | | | | | | |  |
| C8 | Where did you give birth to (NAME)? | | | In my home ….……..1  Other Home …….…..2  Hospital …..……..3  Health Center…….…….4  Health Post …….........5  Private Clinic …….........6  Other (SPECIFY)……....7 | | | | | | |  |
| C9 | After you delivered (NAME), did you eat less than usual, the same as usual, or more than usual? | | | Less……………………..1  Same………..….…….…2  More................................3  Don’t Know…………….99 | | | | | | |  |
| C10 | Now I would like to ask you about the types of foods that you ate yesterday during the day and at night.  READ THE LIST OF FOODS. PLACE ONE IN THE BOX IF THE MOTHER ATE THE FOOD IN QUESTION; PLACE ZERO IN THE BOX IF SHE DIDN’T EAT THE FOOD. | | |  | | | | | | |  |
|  | **Group 1**: Grains, roots and tubers | | |  | | | | | | |  |
|  | 1. Any food made from grains, white roots and tubers and plantains [E.G. Injera, pasta, macaroni, bread], rice, biscuits, or any other foods made from millet, sorghum, maize, rice, wheat, potatoes, yams, cassava, kocho, or any other foods made from roots or tubers? | | | YES ….1 NO….2 DR…..99 | | | | | | |  |
|  | 1. Quality protein maize? | | | YES ….1 NO….2 DR…..99 | | | | | | |  |
|  | 1. Orange-fleshed sweet potato (OFSP)? | | | YES ….1 NO….2 DR…..99 | | | | | | |  |
|  | 1. Any/ (other) porridge? | | | YES ….1 NO….2 DR…..99 | | | | | | |  |
|  | **Group 2**: **Pulses** | | |  | | | | | | |  |
|  | 1. Any foods made from beans, peas and lentils (E.g. Shiro, etc)? | | | YES ….1 NO….2 DR…..99 | | | | | | |  |
|  | 1. Iron or zinc bio-fortified bean? | | | YES ….1 NO….2 DR…..99 | | | | | | |  |
|  | 1. Soybean? | | | YES ….1 NO….2 DR…..99 | | | | | | |  |
|  | **Group 3: Nuts and seeds** | | |  | | | | | | |  |
|  | Any foods made from nuts or seeds, including groundnut, sesame, linseed…etc | | | YES ….1 NO….2 DR…..99 | | | | | | |  |
|  | **Group 4**: Dairy products | | |  | | | | | | |  |
|  | 1. Fresh cattle milk? | | | YES ….1 NO….2 DR…..99 | | | | | | |  |
|  | 1. Fresh goat milk? | | | YES ….1 NO….2 DR…..99 | | | | | | |  |
|  | 1. Cheese, yogurt, or other milk products? | | | YES ….1 NO….2 DR…..99 | | | | | | |  |
|  | 1. Commercially produced milk formula? | | | YES ….1 NO….2 DR…..99 | | | | | | |  |
|  | **Group 5**: **Meat, poultry and fish** | | |  | | | | | | |  |
|  | 1. Meat and organ meat from goat (meat, liver, kidney, heart and others) | | | YES ….1 NO….2 DK…..99 | | | | | | |  |
|  | 1. Meat and organ meat from beef and lamb (meat, liver, kidney, heart and others) | | | YES ….1 NO….2 DK…..99 | | | | | | |  |
|  | 1. Meat and organ meat from chicken (meat, liver, kidney, heart and others) | | | YES ….1 NO….2 DK…..99 | | | | | | |  |
|  | 1. Fresh or dried fish meat | | | YES ….1 NO….2 DK…..99 | | | | | | |  |
|  | **Group 6**: Eggs | | |  | | | | | | |  |
|  | 1. Eggs? | | | YES ….1 NO….2 DR…..99 | | | | | | |  |
|  | **Group 7: Dark green leafy vegetables** | | |  | | | | | | |  |
|  | 1. Any dark green leafy vegetables such as Ethiopian kale, Chinese cabbage, lettuce etc..? | | | YES ….1 NO….2 DR…..99 | | | | | | |  |
|  | **Group 8: Other vitamin A rich fruits and vegetables** | | |  | | | | | | |  |
|  | Mangoes, papayas, Avocado or Other locally available Vitamin A rich fruits? | | | YES ….1 NO….2 DR…..99 | | | | | | |  |
|  | Any dark green leafy vegetables? | | | YES ….1 NO….2 DR…..99 | | | | | | |  |
|  | 1. Pumpkin, carrots, etc? | | | YES ….1 NO….2 DR…..99 | | | | | | |  |
|  | 1. **Group 9: Other vegetables** | | |  | | | | | | |  |
|  | 1. Any other vegetables including onion, cabbage cucumber, tomato and okra, fresh/green pod of bean, pea, corn, etc. and including wild vegetables? | | | YES ….1 NO….2 DR…..99 | | | | | | |  |
|  | 1. **Group 10: Other fruits?** | | |  | | | | | | |  |
|  | 1. Any fruits including banana, grapefruit, guava, lemon, orange, pineapple, strawberry, fruit juice and including wild fruits? | | | YES ….1 NO….2 DR…..99 | | | | | | |  |
|  | **Others** (not counted in the dietary diversity score) | | |  | | | | | | |  |
|  | 1. Any oil, fats, or butter, or foods made with any of these? | | | YES ….1 NO….2 DR…..99 | | | | | | |  |
|  | 1. Any sugary foods such as chocolates, sweets, candies, pastries, cakes, or biscuits? | | | YES ….1 NO….2 DR…..99 | | | | | | |  |
| C11 | How many times did you eat any meals other than liquids yesterday during the day or at night? | | | Number of meals.................. | | | | | | |  |
| PART D: BREASTFEEDING AND COMPLEMENTARY FEEDING | | | | | | | | | | | |
| D1 | What is the first food a new born baby should receive? | | | Only breastmilk...................1  Other .................................2  Don’t Know .......................99 | | | | | | |  |
| D2 | How long after birth did the baby first put to the breast?  *IF LESS THAN 1 HOUR, CIRCLE Immediate, IF LESS THAN 24 HOURS CIRCLE THE HOURS, OTHERWISE Circle DAYS* | | | Immediate............................1  Hours....................................2  Days......................................3  Don’t Remember.................99 | | | | | | |  |
| D3 | During the first three or four days after delivery, before the regular milk began flowing, is it ok to give the liquid (colostrum-the first yellow milk) that came from your breasts to the baby? | | | Yes ........................................1  No ........................................2  Don’t Know ........................99 | | | | | | |  |
| D4 | Have you heard about exclusive breastfeeding? *Exclusive breastfeeding means that the infant gets only breastmilk and no other liquids or foods* | | | Yes ........................................1  No ........................................2  Don’t Know ........................99 | | | | | | |  |
| D5 | At what age should babies start eating foods in addition to breastmilk? | | | At six month …………….…1  Other ……………………….2  Don’t Know ……………....99 | | | | | | |  |
| D6 | How long is it recommended that a mother breastfeeds her child? | | | Six months or less……....…1  months………………..……2  months……………….…….3  24 months and more (correct response)……………….....4  Other…………………...…5 | | | | | | |  |
| D7 | What should we do to prevent malnutrition among young children (6-23 months)?  (Don‘t read the list of options, tick as/ if they mention the options) *Multiple responses are possible (Check as many as apply)* | | | 1. Give more food (Not appropriate answer ) 2. Start feeding additional food at 6th month 3. feed varaity food 4. feed appropriate frequency and amount 5. practice appropriate hand washing 6. responsive feeding 7. Go to health center/ hospitals and check that the child is growing | | | | | | |  |
| D8 | Did you ever breastfeed (NAME)? | | | Yes………………….....……1  No…………………...………2 | | | | | | | D10 |
| D9 | How long after birth did the baby first put to the breast?  *IF LESS THAN 1 HOUR, CIRCLE Immediate, IF LESS THAN 24 HOURS CIRCLE THE HOURS, OTHERWISE Circle DAYS* | | | Immediate................................1  Hours........................................2  Days...........................................3  Don’t Remember.....................99 | | | | | | |  |
| D10 | What did (NAME) drink or eat yesterday during the day or at night. I am interested in whether your child had the item even if it was combined with other foods. Did (NAME) drink/eat: | | |  | | | | | | |  |
|  | 1. Breast milk? | | | YES ….1 NO….2 DR…..99 | | | | | | |  |
|  | 1. Plain water? | | | YES ….1 NO….2 DR…..99 | | | | | | |  |
|  | 1. Any other liquids? | | | YES ….1 NO….2 DR…..99 | | | | | | |  |
|  | **Group 1**:Grains, roots and tubers፡  Any food made from grains, white roots and tubers [E.g. Injera, pasta, macaroni, bread], rice, biscuits, or any other foods made from millet, sorghum, maize, rice, wheat, potatoes, yams, cassava, kocho, or any other foods made from roots or tubers? | | |  | | | | | | |  |
|  | 1. Bread, rice or other foods made from grains like maize, wheat, barley, Teff? | | | YES ….1 NO….2 DR…..99 | | | | | | |  |
|  | 1. Pumpkin, carrots, or sweet potatoes that are yellow or orange inside? | | | YES ….1 NO….2 DR…..99 | | | | | | |  |
|  | 1. Any/(other) porridge or gruel? | | | YES ….1 NO….2 DR…..99 | | | | | | |  |
|  | 1. Quality protein maize? | | | YES ….1 NO….2 DR…..99 | | | | | | |  |
|  | 1. OFSP? | | | YES ….1 NO….2 DR…..99 | | | | | | |  |
|  | **Group 2**: Legumes and nuts | | |  | | | | | | |  |
|  | 1. Any foods made from beans, peas, lentils, or nuts? | | | YES ….1 NO….2 DR…..99 | | | | | | |  |
|  | **Group 3**: Dairy products | | |  | | | | | | |  |
|  | 1. Cheese, yogurt, or other milk products? | | | YES ….1 NO….2 DR…..99 | | | | | | |  |
|  | 1. Commercially produced infant formula? | | | YES ….1 NO….2 DR…..99 | | | | | | |  |
|  | 1. Any fortified, commercially available infant and young child food” [e.g. Cerelac]? | | | YES ….1 NO….2 DR…..99 | | | | | | |  |
|  | 1. Fresh animal milk? | | | YES ….1 NO….2 DR…..99 | | | | | | |  |
|  | **Group 4**: Flesh foods | | |  | | | | | | |  |
|  | 1. Liver, kidney, heart or other organ meats? | | | YES ….1 NO….2 DR…..99 | | | | | | |  |
|  | 1. Any meat, such as beef, lamb, goat, chicken, fish? | | | YES ….1 NO….2 DR…..99 | | | | | | |  |
|  | **Group 5**: Eggs | | |  | | | | | | |  |
|  | 1. Eggs? | | | YES ….1 NO….2 DR…..99 | | | | | | |  |
|  | **Group 6**: Vitamin A fruits and vegetables | | |  | | | | | | |  |
|  | 1. Mangoes, papayas, Avocado or Other locally available Vitamin A rich fruits? | | | YES ….1 NO….2 DR…..99 | | | | | | |  |
|  | 1. Any dark green leafy vegetables? | | | YES ….1 NO….2 DR…..99 | | | | | | |  |
|  | **Group 7**: Other fruits and vegetables | | |  | | | | | | |  |
|  | 1. Any other fruits or vegetables? | | | YES ….1 NO….2 DR…..99 | | | | | | |  |
|  | **Others** (not counted in the dietary diversity score) | | |  | | | | | | |  |
|  | 1. Any oil, fats, or butter, or foods made with any of these? | | | YES ….1 NO….2 DR…..99 | | | | | | |  |
|  | 1. Any sugary foods such as chocolates, sweets, candies, pastries, cakes, or biscuits? | | | YES ….1 NO….2 DR…..99 | | | | | | |  |
|  | 1. Any other solid or semi-solid food? | | | YES ….1 NO….2 DR…..99 | | | | | | |  |
| D11 | How many times did (NAME) eat solid, semi-solid, or soft foods other than liquids yesterday during the day or at night? [No. of times the child ate to be full. Small feeds or bites do not count] | | | Number of Times..................  Child is not eligible……..88  Don’t Know……..…........99 | | | | | | |  |
| **12. Animal Source Food (ASFs) Consumption Frequency among 6-23 months old children** | | | | | | | | | | | |

| Type of foods | | | | More than once a day | | | Once per day | | | | 1-2 times a week | | | | | | 3-6 times a week | | | | 1-2 times/ fortnight | | | 1-2 times a month | | Never | | If Never, ask for self-reported:   1. Occasionally/Holiday/Ceremony 2. Self- reported Consumption Frequencies-write the frequency | | | | | | | | | |
| --- | --- | --- | --- | --- | --- | --- | --- | --- | --- | --- | --- | --- | --- | --- | --- | --- | --- | --- | --- | --- | --- | --- | --- | --- | --- | --- | --- | --- | --- | --- | --- | --- | --- | --- | --- | --- | --- |
| Meat | | | | 🞏 | | | 🞏 | | | | 🞏 | | | | | | 🞏 | | | | 🞏 | | | 🞏 | | 🞏 | |  | | | | | | | | | |
| **Red meat** (e.g. beef, lamb) | | | | 🞏 | | | 🞏 | | | | 🞏 | | | | | | 🞏 | | | | 🞏 | | | 🞏 | | 🞏 | |  | | | | | | | | | |
| **Red meat** (e.g. beef, lamb) | | | |  | | |  | | | |  | | | | | |  | | | |  | | |  | |  | |  | | | | | | | | | |
| Red meat from goat | | | | 🞏 | | | 🞏 | | | | 🞏 | | | | | | 🞏 | | | | 🞏 | | | 🞏 | | 🞏 | |  | | | | | | | | | |
| **Processed meats** (e.g. dried meat/Kuwanta,) | | | | 🞏 | | | 🞏 | | | | 🞏 | | | | | | 🞏 | | | | 🞏 | | | 🞏 | | 🞏 | |  | | | | | | | | | |
| **White meat** (e.g. chicken) | | | | 🞏 | | | 🞏 | | | | 🞏 | | | | | | 🞏 | | | | 🞏 | | | 🞏 | | 🞏 | |  | | | | | | | | | |
| Any fish meat | | | | 🞏 | | | 🞏 | | | | 🞏 | | | | | | 🞏 | | | | 🞏 | | | 🞏 | | 🞏 | |  | | | | | | | | | |
| **Any processed fish** (e.g. sardines) | | | | 🞏 | | | 🞏 | | | | 🞏 | | | | | | 🞏 | | | | 🞏 | | | 🞏 | | 🞏 | |  | | | | | | | | | |
| **Eggs** | | | | 🞏 | | | 🞏 | | | | 🞏 | | | | | | 🞏 | | | | 🞏 | | | 🞏 | | 🞏 | |  | | | | | | | | | |
| Cattle whole milk | | | | 🞏 | | | 🞏 | | | | 🞏 | | | | | | 🞏 | | | | 🞏 | | | 🞏 | | 🞏 | |  | | | | | | | | | |
| Goat whole milk | | | | 🞏 | | | 🞏 | | | | 🞏 | | | | | | 🞏 | | | | 🞏 | | | 🞏 | | 🞏 | |  | | | | | | | | | |
| **Goat milk products (**Yoghurt, Skimmed milk, cheeses, Whey) | | | | 🞏 | | | 🞏 | | | | 🞏 | | | | | | 🞏 | | | | 🞏 | | | 🞏 | | 🞏 | |  | | | | | | | | | |
| **cattle milk products (**Yoghurt, Skimmed milk, cheeses, Whey) | | | |  | | |  | | | |  | | | | | |  | | | |  | | |  | |  | |  | | | | | | | | | |
| **cattle milk products (**Yoghurt, Skimmed milk, cheeses, Whey) | | | | 🞏 | | | 🞏 | | | | 🞏 | | | | | | 🞏 | | | | 🞏 | | | 🞏 | | 🞏 | |  | | | | | | | | | |
| Camel milk | | | | 🞏 | | | 🞏 | | | | 🞏 | | | | | | 🞏 | | | | 🞏 | | | 🞏 | | 🞏 | |  | | | | | | | | | |
| Part E: **Agricultural/ Access to Cultivable Land:** | | | | | | | | | | | | | | | | | | | | | | | | | | | | | | | | | | | | |  |
| F1 | | Do you have access to cultivable land? | | | | | | | | | | | Yes ......................................1  No .......................................2 | | | | | | | | | | | | | | | | | | | | | | | |  |
| F2 | | Please, indicate the total size of your cultivable land in hectares | | | | | | | | | | | Less than half hectare ………..1  From half to 1 hectare ………..2  From 1 hectare to 2 hectare .…3  Above 2 hectare………….…...4 | | | | | | | | | | | | | | | | | | | | | | | |  |
| F3 | | Please, indicate the size of your cultivable land in hectares by type of ownership. | | | | | | | | | | | Owned _____________Hectares  Rented/contract __________Hectares  Share cropping __________Hectares  Other (specify) __________Hectares | | | | | | | | | | | | | | | | | | | | | | | |  |
| **Part G.Nutrition Sensitive Agricultural Practices and Inputs given by the project** | | | | | | | | | | | | | | | | | | | | | | | | | | | | | | | | | | | | | | |
| G1 | | Did you receive practical training on home gardening in the last 5 years? | | | | | | | | | | | | | | Yes…………………………...….….……..1  No…………....………………...…….…....2 | | | | | | | | | | | | | | | | | | | | |  | |
| G2 | | Have you received practical training on post-harvest management in the last 5 years? | | | | | | | | | | | | | | Yes…………………………...….…….…..1  No…………....………………...……….....2 | | | | | | | | | | | | | | | | | | | | |  | |
| G3 | | Do you have a home garden? | | | | | | | | | | | | | | Yes…………………………...….………...1  No…………....………………...……….....2 | | | | | | | | | | | | | | | | | | | | | G5 | |
| G4 | | If yes, what type of crops do you grow in the home garden? | | | | | | | | | | | | | | Vegetables ……………………….…....….1  Fruits …………………………….….…....2  Tubers………………..…………...………3  Other (specify) …………………….….....4 | | | | | | | | | | | | | | | | | | | | |  | |
| G5 | | Had you accessed extension services on vegetable production in the last 5 years? | | | | | | | | | | | | | | Yes…………………………...….………..1  No…………....………………...………....2 | | | | | | | | | | | | | | | | | | | | |  | |
| G6 | | Training on improved livestock/poultry production in the last 5 years | | | | | | | | | | | | | | Yes…………………………...….………..1  No…………....………………...………....2 | | | | | | | | | | | | | | | | | | | | |  | |
| G7 | | Are you using any improved inputs in your farming practices? | | | | | | | | | | | | | | Yes…………………………...….………..1  No…………....………………...………....2 | | | | | | | | | | | | | | | | | | | | |  | |
| G8 | | What kind of improved agricultural inputs do you use in your farming practices? *Circle all that apply* | | | | | | | | | | | | | | Improved seeds............................................1  Fertilizer.......................................................2  Chemicals.................................................3  Other (specify) ………..…….……….….…4 | | | | | | | | | | | | | | | | | | | | |  | |
| G9 | | If you are not using any improved inputs what are the reasons?  Circle all that apply | | | | | | | | | | | | | | Shortage of cash to buy inputs …….….......1  Lack of supply of inputs ………………..….2  No desire to use the inputs ……..………….3  Lack of knowledge about improved input.....4  Other (specify) ……………………….......5 | | | | | | | | | | | | | | | | | | | | |  | |
| G10 | | Has your household received extension service from any government and/ NGOs in the last 5 years? | | | | | | | | | | | | | | Yes…………………………...….………….1  No…………....………………....………......2 | | | | | | | | | | | | | | | | | | | | |  | |
| G11 | | Have you received any training in nutrition sensitive agricultural value chains in the last five years? | | | | | | | | | | | | | | Yes …………………………………..…1  No..……………………………..….……2 | | | | | | | | | | | | | | | | | | | | | 🢂G13 | |
| G12 | | What type of training have you received in nutrition sensitive agricultural value chains? *Read list and circle all that apply* | | | | | | | | | | | | | | Vegetable and fruit production, consumption and marketing.....................................................................1  Drying, grinning, grading and packaging pulses and major crops ………………………………..…....2  Poultry production and preparation of food…….…3  Apiculture production, processing, marketing…….4  Other (specify),………………..…..….………....…5 | | | | | | | | | | | | | | | | | | | | |  | |
| G13 | | Are you currently involved in any of these nutrition sensitive agricultural value chains? *Read list and circle all that apply.* | | | | | | | | | | | | | | Vegetable and fruit production, consumption and marketing…………………..…………..….…….........1  Drying, grinning, grading and packaging pulses and major crops ………………..………...…….…......2  Poultry production and preparation of food …...….3  Apiculture production, processing, marketing.........4  Other (specify),……………………..….…..…....…5  None………………………….……….…………...6 | | | | | | | | | | | | | | | | | | | | | 🢂G14 | |
| G13a | | If you are involved in vegetable production what is the main use of vegetable produce? | | | | | | | | | | | | | | 1. Mainly own consumption….………………..…..1  2. Mainly for sale ………………..………………..2  3. Both…………………………..……….…….…..3 | | | | | | | | | | | | | | | | | | | | |  | |
| G13b | | If you are involved in fruit production what is the main use of fruit produce? | | | | | | | | | | | | | | 1. Mainly own consumption….………….…..…..1  2. Mainly for sale ………………..…….….....…..2  3. Both…………………………..……….………..3 | | | | | | | | | | | | | | | | | | | | |  | |
| G13c | | If you are involved in animal/poultry production and preparation of food what is the main use of animal/poultry main use of animal products? (Meat, milk, eggs, fish, etc.)? | | | | | | | | | | | | | | 1. Mainly own consumption….…………..…..…..1  2. Mainly for sale ……………………….………..2  3. Both…………………………..…………….…..3 | | | | | | | | | | | | | | | | | | | | |  | |
| G13d | | If you are involved in Apiculture production what is the main use of Apiculture production? | | | | | | | | | | | | | | 1. Mainly own consumption….………….……...1  2. Mainly for sale ……………………..….….....2  3. Both…………………………..……....……....3 | | | | | | | | | | | | | | | | | | | | |  | |
| G13e | | If you are involved in drying, grinning, grading and packaging pulses and major crops production what is the main use? | | | | | | | | | | | | | | 1. Mainly own consumption…………………..…1  2. Mainly for sale ………………….………...….2  3. Both……………………………….………......3 | | | | | | | | | | | | | | | | | | | | |  | |
| G13f | | If productions are sold in local markets, who decides upon the use of the (additional) income? | | | | | | | | | | | | | | Husband .………..…….………………..…….....1  Wife .……..…………..………………….……...2  Both (in consultation) ...................................…3 | | | | | | | | | | | | | | | | | | | | |  | |
| G14 | | If you are not producing any of the following agricultural produce are you consuming them by buying from the market? | | | | | | | | | | | | | | Vegetables …………….….………….………..…1  Fruits ………………….….……………………....2  Animal/poultry products and by products …..…...3  Honey ….……………………….………...……..4 | | | | | | | | | | | | | | | | | | | | |  | |
| G15 | | Have you received any training in diverse/off-farm income generating activities? | | | | | | | | | | | | | | Yes ..........................................................1  No ...........................................................2 | | | | | | | | | | | | | | | | | | | | | G17 | |
| G16 | | What type of training in income generating activities have you received? *Read list and circle all that apply.* | | | | | | | | | | | | | | Petty trade ……………….………....….1  Sale of firewood/charcoal………….......2  Carpentry/masonry works ……….....…3  Blacksmith/handicrafts …...............…..4  Pottery ……………………...........…...5  Weaving ……………….................…..7  Leather works ………..........................8  Other (specify) ____ ……………...…..9 | | | | | | | | | | | | | | | | | | | | |  | |
| G17 | | Are you currently practicing any non-farm income generating activities? *Read list and check all that apply* | | | | | | | | | | | | | | Petty trade …………..….……………..1  Sale of firewood/charcoal………….....2  Carpentry/masonry works …….….…..3  Blacksmith/handicrafts ….............……4  Pottery ……………….......……….......5  Weaving ………………….….....…….7  Leather works .....................................8  Daily labor ………………………....….9  Other (specify) ____ ……………..……10 | | | | | | | | | | | | | | | | | | | | |  | |
| G18 | | Ever attended food safety training? | | | | | | | | | | | | | | Yes ................................................1  No ................................................2 | | | | | | | | | | | | | | | | | | | | |  | |
| G19 | | Have you ever attended any cooking demonstration organized in your village? | | | | | | | | | | | | | | Yes ................................................1  No ................................................2 | | | | | | | | | | | | | | | | | | | | |  | |
| G20 | | How frequent the DA visited you? | | | | | | | | | | | | | | Never ………………………….…...1  Every six month………………........2  Quarterly…………………..….…....3  Every month………………………..4  Every two weeks ………………......5  Other …………………………...…..6 | | | | | | | | | | | | | | | | | | | | |  | |
| G21 | | How frequent the HEWs visited you? | | | | | | | | | | | | | | Never …………………….……..1  Every six month……….…..…....2  Quarterly……………….….........3  Every month…………….……....4  Every two weeks …….….……...5  Other ………………….…..……6 | | | | | | | | | | | | | | | | | | | | |  | |
| G22 | | Did you get health and nutrition education on maternal, infant and young child nutrition in the last one year? | | | | | | | | | | | | | | Yes ...................................................1  No ....................................................2 | | | | | | | | | | | | | | | | | | | | |  | |
| G23 | | Are there sources of financial credit in your community? | | | | | | | | | | | | | | Yes………………….……………...1  No……………………………….....2  Don’t know ………..……………. 99 | | | | | | | | | | | | | | | | | | | | |  | |
| G24 | | Have you accessed any credit during the last 12 months? | | | | | | | | | | | | | | Yes………………………….….….1  No……………………………….....2 | | | | | | | | | | | | | | | | | | | | | G26 | |
| G25 | | For what purpose did you borrow this money? Circle as many as apply. | | | | | | | | | | | | | | Agricultural input purchase………1  Livestock purchase…………….…2  Start up a new business……….…..3  Expansion of existing business…...4  Household consumption…….…….5  Other (specify)………….……........6 | | | | | | | | | | | | | | | | | | | | |  | |
| G26 | | If you are adopting nutrition sensitive agriculture methods (produce and consume), is there any observable change in your income? | | | | | | | | | | | | | | 1.Yes, it has increased ……….……..1  2.Yes, it has decreased ……….……..2  3.No, there is no change….…………..3 | | | | | | | | | | | | | | | | | | | | |  | |
| **Food Security** | | | | | | | | | | | | | | | | | | | | | | | | | | | | | | | | | | | | | | |
| H1 | | How would you rate crop production during 2013/2014 E.C? | | Same as normal year……………..….1  Below normal year…….………...….2  Above normal year………………….3  Not produced………………………...4  Don’t know………………….……... 99 | | | | | | | | | | | | | | | | | | | | | | | | | | | | | | | | |  | |
| H2 | | If production for 2013/2014 was below a normal year what were the causes?  Ask participant to put causes in order of importance. | | Shortage of rainfall/drought................ |___|  Shortage of fertilizer........................... |___|  Shortage of labor ..................................|___|  Shortage of land ...................................|___|  Pest infestation ....................................|___|  Diseases................................................|___|  Flood.....................................................|___|  Shortage of seeds ................................|___|  Hail storm.............................................|___|  Excess rainfall ………..........................|___|  Other specify ........................................|___| | | | | | | | | | | | | | | | | | | | | | | | | | | | | | | | | |  | |
| H3 | | If production for 2013/2014 was below a normal year, did your household face a shortage of food as a result? | | Yes……………………….……………1  No……………………………...……...2  Don’t know ………….…………….... 99 | | | | | | | | | | | | | | | | | | | | | | | | | | | | | | | | | H5 | |
| H4 | | In a normal year, have you ever faced a food shortage? | | Yes……………………….……………1  No……………………..………...……...2 | | | | | | | | | | | | | | | | | | | | | | | | | | | | | | | | | H6 | |
| H5 | | If yes, what time of the year do you normally experience food shortages?  Check all the responses given | | Jan | | Feb | Mar | | | | Apr | | | | May | | | | Jun | | | | Jul | Aug | | | | Sep | | Oct | | | Nov | Dec | | | Total number  of months | |
|  | |  |  | | | |  | | | |  | | | |  | | | |  |  | | | |  | |  | | |  |  | | |  | |
| H6 | | **Assessing Food Security Status using HFIAS Questions** | | | | | | | Occurrence | | | | | | | | | | | | Frequency(How often?) | | | | | | | | | | | | | | | | | |
| Yes (1) | | | | | | | | No (2) | | | | Never  (0) | | | | | Rarely (1) | | | | | | Sometimes (2) | | | | Often (3) | | |
| A | | In the past four weeks, did you worry that your household would not have enough food? | | | | | | |  | | | | | | | |  | | | |  | | | | |  | | | | | |  | | | |  | | |
| B | | In the past four weeks, were you or any household member not able to eat the kinds of food you preferred due to the lack of resources? | | | | | | |  | | | | | | | |  | | | |  | | | | |  | | | | | |  | | | |  | | |
| C | | In the past four weeks, did you or any household member have to eat **a limited variety** of foods due to lack of means to buy them? | | | | | | |  | | | | | | | |  | | | |  | | | | |  | | | | | |  | | | |  | | |
| D | | In the past four weeks, did you or any household member have to eat some foods that you really did not want to eat because of a lack of resources to obtain other types of food? | | | | | | |  | | | | | | | |  | | | |  | | | | |  | | | | | |  | | | |  | | |
| E | | In the past four weeks, did you or any household member have to eat a **smaller meal** than you felt you needed because there was not enough food? | | | | | | |  | | | | | | | |  | | | |  | | | | |  | | | | | |  | | | |  | | |
| F | | In the past four weeks, did you or any other household member have to eat **fewer meals** in a day because there was not enough food? | | | | | | |  | | | | | | | |  | | | |  | | | | |  | | | | | |  | | | |  | | |
| G | | In the past four weeks, did you worry that your household would not have enough food? | | | | | | |  | | | | | | | |  | | | |  | | | | |  | | | | | |  | | | |  | | |
| H | | In the past four weeks, did you or any household member go to sleep at night hungry because there was not enough food? | | | | | | |  | | | | | | | |  | | | |  | | | | |  | | | | | |  | | | |  | | |
| I | | In the past four weeks, did you or any household member go a whole day and night without eating anything because there was not enough food? | | | | | | |  | | | | | | | |  | | | |  | | | | |  | | | | | |  | | | |  | | |
| **b Frequency codes: 0-Never; 1-Rarely (1-2 times); 2-Sometimes (3-10 times); 3-Often; (>10 times) during the past 4 weeks** | | | | | | | | | | | | | | | | | | | | | | | | | | | | | | | | | | | | | | |
| H7 | | **Food Insecurity** **Experience Scale (FIES):**  Now I would like to ask you some questions about food. During the last 12 months, was there a time when, because of lack of money or other resources: | | | | | | | | | | | Occurrence | | | | | | | | | | | | Frequency(How often?) | | | | | | | | | | | | | |
| Yes (1) | | | | | | | No (2) | | | | | Rarely (1) | | | | | | Sometimes (2) | | | | Often (3) | | | |
| A | | You were worried you would not have enough food to eat? | | | | | | | | | | |  | | | | | | |  | | | | |  | | | | | |  | | | |  | | | |
| B | | You were unable to eat healthy and nutritious food? | | | | | | | | | | |  | | | | | | |  | | | | |  | | | | | |  | | | |  | | | |
| C | | You ate only a few kinds of foods? | | | | | | | | | | |  | | | | | | |  | | | | |  | | | | | |  | | | |  | | | |
| D | | You had to skip a meal? | | | | | | | | | | |  | | | | | | |  | | | | |  | | | | | |  | | | |  | | | |
| E | | You ate less than you thought you should? | | | | | | | | | | |  | | | | | | |  | | | | |  | | | | | |  | | | |  | | | |
| F | | Your household ran out of food? How often did this happen? | | | | | | | | | | |  | | | | | | |  | | | | |  | | | | | |  | | | |  | | | |
| G | | You were hungry but did not eat? How often did this happen? | | | | | | | | | | |  | | | | | | |  | | | | |  | | | | | |  | | | |  | | | |
| H | | You went without eating for a whole day? How often did this happen? | | | | | | | | | | |  | | | | | | |  | | | | |  | | | | | |  | | | |  | | | |
| Notes for data collectors: * Rarely (1 or 2 times), sometimes (3 to 10 times), Often (more than 10 times) | | | | | | | | | | | | | | | | | | | | | | | | | | | | | | | | | | | | | | |
| H8 | | What strategies did your household use to cope with the food shortage? | | | | | | | | 1. Eating less-preferred foods …………………….…...1 2. Borrowing food/money from friends and relatives.....2 3. Limiting portion sizes at mealtimes ……………...…3 4. Limiting adult intake of food so children can eat …..4 5. Reducing the number of meals per day ……...….......5 6. Other (Specify)............................................................6 | | | | | | | | | | | | | | | | | | | | | | | | | |  | | |
| PART I: GENDER/Women Empowerment | | | | | | | | | | | | | | | | | | | | | | | | | | | | | | | | | | | | | | |
| I1 | | Which of these resources do you have control over? (You can choose more than one option) | | | | | | | | 1. Farm land ....................................................................1 2. Home grown fruits and vegetables .............................2 3. Livestock products (dairy products, meat and eggs) ..3 4. Shoat (sheep and goat) ................................................4 5. Cattle ...........................................................................5 6. Poultry .........................................................................6 7. Fish ..............................................................................7 | | | | | | | | | | | | | | | | | | | | | | | | | |  | | |
| I2 | | If productions are sold in local markets, who decides upon the use of the (additional) income? | | | | | | | | 1. Husband ..............................................................1 2. Wife ....................................................................2 3. both (in consultation) .........................................3 | | | | | | | | | | | | | | | | | | | | | | | | | |  | | |
| I3 | | Do you have your own income? | | | | | | | | Yes ...........................................................................1  No ...........................................................................2 | | | | | | | | | | | | | | | | | | | | | | | | | |  | | |
| I4 | | What do you invest your income on? (You can choose more than one option) | | | | | | | | - 1. Buy more food .................................................1   2. Hand to husband ..............................................2   3. Invest on household health ..............................3   4. Educational expenses ......................................4   5. Buy sanitary goods ..........................................5   6. Buy shoes and clothes......................................6   7. Other (Specify)..………….............................. | | | | | | | | | | | | | | | | | | | | | | | | | |  | | |
| I5 | | Whose responsibility is taking care or feeding of the child in the house? | | | | | | | | Myself………...…..…………….……..…….….1  The Father ………..…..............................……...2  Both of us ………………...................................3  Other (Specify)..……….………………............4 | | | | | | | | | | | | | | | | | | | | | | | | | |  | | |
| I6 | | Who in your family usually has the final say regarding the health of children at home? | | | | | | | | Myself………...………….…………….….….1  The Father ……………......……….……….....2  Both of us ……………….................................3  Other (Specify)..……….…...............................4 | | | | | | | | | | | | | | | | | | | | | | | | | |  | | |
| I7 | | Are you a member in any group/ association? | | | | | | | | Yes ...................................................................1  No ....................................................................2 | | | | | | | | | | | | | | | | | | | | | | | | | |  | | |

THANK YOU FOR YOUR PARTICIPATION

**Discussion Guide for KII with AEWs/DAs**

| Name of the Interviewee |  |
| --- | --- |
| Name/Code of the Kebele |  |
| Name of the interviewer: | ______________________Date:__________________ |
| Name of the Supervisor: | ______________________Date:_______________ |

- 1. Would you please tell us how long you have worked in this facility or area? ___year & ___months.
  2. How long have you been in your current position? ___year & ___months.
  3. How frequent you are visiting farmers at farm site?
  4. What are your activities during farm visit?
  5. What are the major livelihood activities that the majority of the kebele populations rely on to make a living?
  6. Do famers practicing irrigation in your Kebele?
  7. If yes, what percentage of farmers:

1. all of the farmers,
2. most of the farmers,
3. half of the farmers,
4. less than half of the farmers,
5. None of the farmers?
   1. What are the challenges faced for crop and livestock production in the kebele? Probe:
6. Access to extension services (veterinary, improved seeds, fertilizers);
7. Distance/access to markets;
8. Access to credit;
9. Crop/livestock diseases;
10. Rain shortage;
11. Limited land productivity; degradation of land in kebele.
    1. Are there any types of crops and livestock that could improve household food security? Have there been any improvements in the food shortage situation over the past three years?
    2. What are the major types of income generating activities practiced by farmers/household in your Kebele?
    3. What challenges do farmers/households face in practicing income generation activities in your Kebele?

**Probe**:

- about access to markets,
- transportation of products to market,
- access to new technology, tools or training.
- Improved seed/varieties
- Fertilizer
- Herbicides
- Pesticides
- Improved storage technology
- Veterinary Service
- Improved bred
  1. What types of extension services do you provide to farmers in your kebele?

**Probe:**

- about training opportunities for farmers,
- types of training conducted,
- Cooking Demonistrations at FTCs
- field visits,
- supply of agricultural inputs,
- animal care, etc.
  1. Have you heard about Nutrition Sensitive Agriculture? What do you know about it? How you learn about it?
  2. Have you been trained on NSA?
  3. When was the last training?
  4. How did you apply these learning to your work?
  5. What are your roles and responsibilities in the implementation of Nutrition Sensitive Agriculture?
  6. How can Agriculture Development Agents contribute to improve the food and nutrition of children and women in your community?
  7. Are there changes since the NSA intervention started in your woreda? (only for intervention woreda)

**Probe:**

- To increase year-round availability, access and consumption of diverse, safe and nutritious foods of both plant and animal origin
- To ensure women and youth empowerment and gender equality
  1. What are the major challenges you/your office face in delivery of agricultural extension services especially related to nutrition sensitive agriculture?

**Probe:**

a) Socio Cultural and Behavioral:

b) Economic:

c) Institutional

d) Geographical:

- 1. Is there adequate collaboration between HEWs and DAs/CAHWs to improve the nutrition of children and women in your community? (if yes, please explain)

Anything that you would like to tell us before we close our discussion?

Thank the Participant

**Discussion Guide for Key Informant Interview with HEWs**

| Name of the Interviewee |  |
| --- | --- |
| Name/Code of the Kebele |  |
| Name of the interviewer: | ______________________Date:__________________ |
| Name of the Supervisor: | ______________________Date:_______________ |

- 1. Would you please tell us how long you have worked in this facility or area? ___year & ___months.
  2. How long have you been in your current position? ___/year & ___months.

Now, I want to ask you some Questions related to nutrition situation in your Kebele;

- 1. What are your roles and responsibilities in the implementation of Nutrition Sensitive Agriculture?
     - How frequent you are conducting home visit?
     - What are your activities during home visit?
     - How frequent you are conducting cooking demonstrations?
  2. Is there a monthly growth monitoring promotion (GMP) service at your health post

**Probe:** what services do the mothers get during GMP,

- 1. What is your assessment of breastfeeding practices in your community?

Probe:

- Do they feed the babies with colostrum?
- Did they provide pre-lacteal feeds? If yes, what kind of feeds and why do they give them?
  1. What are the issues, challenges, obstacles facing mothers and caregivers in breastfeeding their children?
  2. What is your assessment of the complimentary feeding practices in your community? What are the issues, challenges, obstacles facing mothers and caregivers in feeding their children with complementary foods?
  3. What is your assessment on maternal nutrition practices (feeding during pregnancy and lactation) in your community? What are the issues?

- 1. Have you heard about Nutrition Sensitive Agriculture (NSA)? What do you know about it? How you learn about it?
  2. Have you been trained on NSA?

1. When was the last training?
2. How did you apply these learning to your work?
   1. Are there changes since the NSA intervention started in your woreda? (only for intervention woreda)

**Probe:**

- To increase year-round availability, access and consumption of diverse, safe and nutritious foods of both plant and animal origin
- To ensure women and youth empowerment and gender equality
  1. How closely are you working with Agriculture Extension Workers in your Kebele?

1. How frequently do you meet?
2. What do you discuss during these meetings?
3. How closely are you working with School directors in your Kebele to combat malnutrition and problems related to WASH?
   1. What are the major challenges you/your office face in implementing NSA?

**Probe:**

a) Socio Cultural and Behavioral

b) Economic

c) Institutional

d) Geographical

Anything that you would like to tell us before we close our discussion?

Thank the Participant

**Discussion Guide for KII with Woreda Agriculture and Health Offices**

| Name of the Interviewee |  |
| --- | --- |
| Position |  |
| Name/Code of the Woreda |  |
| Sector: | 1. Agriculture 2. Health |
| Name of the interviewer: | ______________________Date:________ |
| Name of the Supervisor: | ______________________Date:_______ |

- - 1. Would you please tell us how long you have worked in this facility or area? ___year & ___months.
    2. How long have you been in your current position? ______year & _______months.
    3. Have you been trained on NSA?

1. When was the last training?
2. How did you apply these learning to your work?
   - 1. Are there changes since the NSA intervention started in your woreda? (only for intervention woreda)

**Probe:**

- To increase year-round availability, access and consumption of diverse, safe and nutritious foods of both plant and animal origin
- To ensure women and youth empowerment and gender equality
  - 1. What are the major challenges you/your office face in implementing NSA?

**Probe:**

a) Socio Cultural and Behavioral

b) Economic

c) Institutional

d) Geographical

- - 1. Is there a multi-sectoral (NNP signatories including health, agriculture, water office…) nutrition task force in the woreda?

**Probe:** Is it currently active? What were the taskforce contributions so far on prevention of food and nutrition insecurity?

**FGD Guide with Women with Children Under 2 Years**

First, I’d like everyone to introduce themselves. Can you tell us your name?

Demographic Data

| Participant’s code | Age | Education | # of years lived in the community |
| --- | --- | --- | --- |
| P1 |  |  |  |
| P2 |  |  |  |
| P3 |  |  |  |
| P4 |  |  |  |
| P5 |  |  |  |
| P6 |  |  |  |
| P7 |  |  |  |
| P8 |  |  |  |
| P9 |  |  |  |
| P10 |  |  |  |
| Name/Code of the Kebele | |  |
| Name of facilitator: | |  |
| Name of the Supervisor: | |  |

Note for note takers: Please take note in the respective space while you are recording the session.

- - 1. What/who are the most important sources of information regarding to maternal and child nutrition? Why?
    2. What are some of the challenges farmers face in your woreda with crop and livestock production?

**Probe:** access to extension services (vets) and inputs (improved seeds, fertilizers); distance/access to markets; access to credit; crop/livestock diseases; rain shortage; limited land productivity; degradation of land in Kebele.

- - 1. What is the extent of food insecurity in the area?

**Probe:** How do people cope during a bad harvest season and what causes bad harvests in your area; who is more affected/less affected (i.e. men, women, children (boys and girls), poor, livestock keepers; are there any types of crops and livestock that could improve household food security? Have there been any improvements in the food shortage situation over the past two years?

- - 1. Have you heard about Nutrition Sensitive Agriculture (NSA)? What do you know about it? How do you learn about it?
    2. Are there NSA interventions implemented in your community? Please mention implemented NSA interventions.

**Probe:**

1. Any training given on NSA?
2. Any disseminated leaflets, brochures… on NSA
3. Fruits and vegetable nursery sites and established and distributed seed and seedlings
4. Promotion and distribution of nutrient dense improved varieties and bio-fortified crops seeds (Eg:- OFSP, QPM…)
5. Poultry reproduction centers and chicken distribution
6. Livestock promoted and distributed (eg:- goat, sheep, milking cow…)
7. Veterinary clinic service (eg:- AI,…..)
8. Community fish pond established and producing fish
9. Modern bee keeping houses distributed
10. Types of postharvest handling and processing technologies introduced
11. Cooking demonstration at the FTC and health posts
12. Small scale irrigation scheme established and farmers use (fruit and vegetable production and commercialization)
13. Multipurpose trees (fruits) distribution and planting
14. NSA key messages and practices provided during resource transfer (PSNP beneficiary HHs group)
    - 1. How many of you received any training in nutrition sensitive agricultural value chains?
15. Who trained you? When?
    - 1. What type of training have you received in nutrition sensitive agricultural value chains? *Read list*
16. Vegetable and fruit production, consumption and marketing
17. Drying, grinning, grading and packaging pulses and major crops
18. Poultry production and preparation of food
19. Apiculture production, processing, marketing
20. other (specify)

Ask for a show of hands, and record the number of positive responses. Probe: Ask participants do describe the type of value chain they are involved in. Ask if they feel that these value chains are improving their family’s food and nutritional security.

- - 1. Are you involved in any nutrition sensitive value chains? Yes /No

Are you currently involved in any of these nutrition sensitive agricultural value chains? *Read list and circle all that apply.*

1. Vegetable and fruit production, consumption and marketing
2. Drying, grinning, grading and packaging pulses and major crops
3. Poultry production and preparation of food
4. Apiculture production, processing, marketing
5. other (specify)

Ask for a show of hands, and record the number of positive responses. Probe: Ask participants do describe the type of value chain they are involved in. Ask if they feel that these value chains are improving their family’s food and nutritional security.

THANK PARTICIPANTS FOR THE INTERVIEW
